# Supplementary material
Source: ML conference proceedings conference paper supplement (https://proceedings.mlr.press/v139/cho21a.html)
Supplement: Supplementary file [file cho21a-supp.pdf]

---

# Supplementary Materials for Unifying Vision-and-Language Tasks via Text Generation

---

Jaemin Cho<sup>1</sup> Jie Lei Hao Tan Mohit Bansal

UNC Chapel Hill

{jmincho, jielei, haotan, mbansal}@cs.unc.edu

In the supplementary materials, we include the detailed comparisons of our models with recent vision-and-language transformer baselines (Sec. A) and the implementation details (Sec. B).

## A. Comparison with Baselines

In Table 1, we compare the baseline vision-and-language transformers with our VL-T5 and VL-BART in detail, including their pretraining datasets, architecture, etc.

## B. Implementation Details

In Table 2 and Table 3, we show the detailed statistics of our pretraining and downstream datasets and tasks. In Table 4, we show the hyperparameters that we used in our pretraining and downstream task experiments. We provide the links to download pretraining and downstream datasets.

### B.1. Pretraining Data

Overall, our pretraining dataset contains 9.18M image-text pairs on 180K distinct images. We carefully split our pretraining data to avoid any intersection between our training data and the validation/test sets of the downstream tasks (e.g., COCO Captioning, RefCOCOg). In this process, around 10K images are excluded from the training sets of COCO<sup>1</sup> and Visual Genome<sup>2</sup>. We use COCO *Karpathy val split* (Karpathy & Fei-Fei, 2015) with 5,000 images as our validation set to monitor pretraining performance.

---

<sup>1</sup>UNC Chapel Hill. Correspondence to: Jaemin Cho <jmincho@cs.unc.edu>.

*Proceedings of the 38<sup>th</sup> International Conference on Machine Learning*, PMLR 139, 2021. Copyright 2021 by the author(s).

<sup>1</sup><https://cocodataset.org/#download>

<sup>2</sup>[http://visualgenome.org/api/v0/api\\_home.html](http://visualgenome.org/api/v0/api_home.html)

### B.2. Downstream Tasks

**VQA<sup>3</sup>, COCO caption** For both VQA and COCO captioning tasks, we follow *Karpathy split* (Karpathy & Fei-Fei, 2015), which re-splits train2014 and val2014 COCO images (Lin et al., 2014) into 113,287 / 5,000 / 5,000 images for train / validation / test.

**GQA<sup>4</sup>** Following LXMERT (Tan & Bansal, 2019), we use GQA-balanced version. We use train and val splits for training and use test-dev split for validation. Train / val / test-dev splits consist of 943,000 / 132,062 / 12,578 questions, respectively.

**NLVR<sup>2 5</sup>** Train / val / test-P splits consist of 86,373 / 6982 / 6967 sentences, respectively. We train our model on train split and use val split for validation.

**VCR<sup>6</sup>** Train / val / test splits consist of 212,923 / 26,534 / 25,263 questions, respectively. We train our model on train split and use val split for validation.

**RefCOCOg<sup>7</sup>** We use *umd* split, which consists of train / val / test sets with 42,226 / 2,573 / 5,023 sentences, respectively. Following UNITER (Chen et al., 2020) and MAttNet (Yu et al., 2018), we use ground truth COCO boxes for training, and use the detected boxes from an off-the-shelf Mask R-CNN<sup>8</sup> as candidates during inference.

**Multi30K En-De<sup>9</sup>** The train / val / test2016 / test2017 / test2018 splits consist of 29,000 / 1,014 / 1,000 / 1,000 / 1,017 English-German sentence pairs, respectively.

---

<sup>3</sup><https://visualqa.org/download.html>

<sup>4</sup><https://cs.stanford.edu/people/dorarad/gqa/download.html>

<sup>5</sup><http://lil.nlp.cornell.edu/nlvr/>

<sup>6</sup><https://visualcommonsense.com/download/>

<sup>7</sup><https://github.com/lichengunc/refer>

<sup>8</sup><https://github.com/lichengunc/MAttNet#pre-computed-detectionsmasks>

<sup>9</sup><https://github.com/multi30k/dataset>

Table 1. Summary of baseline vision-and-language transformers. <sup>a</sup>Since not all models report exact parameter numbers, we provide rough estimates compared to BERT<sub>Base</sub> (86M; noted as P), where word embedding parameters are excluded. <sup>b</sup>LXMERT and XGPT are not initialized from pretrained language models. LXMERT authors found pretraining from scratch was more effective than initialization from BERT<sub>Base</sub> in their experiments. XGPT uses text pretraining on Conceptual captions and COCO captions with Masked LM (Devlin et al., 2019) and Masked Seq2Seq (Song et al., 2019) objectives before V&L pretraining. <sup>c</sup>LXMERT (text+visual+cross-modal) and ViLBERT (cross-modal) use dual-stream encoders. ViLBERT uses 768/1024-dim hidden states for text/visual streams respectively. XGPT uses AoA module (Huang et al., 2019) as visual encoder. Rest of the models use single-stream encoders. <sup>d</sup>For generation tasks, Unified VLP and Oscar use causal mask and reuse encoder as decoder similar to UniLM. <sup>e</sup>XGPT also uses shared parameters for encoder and decoder, but its decoder is right-shifted and predicts next tokens. <sup>f</sup>Unified VLP is initialized from UniLM, which is initialized from BERT<sub>Large</sub>. <sup>g</sup>Oscar uses object tags as additional text inputs.

|                        | V&L Pretraining          |        |                      | Hyperparameters      |                       |                       |                       |                 |              |
|------------------------|--------------------------|--------|----------------------|----------------------|-----------------------|-----------------------|-----------------------|-----------------|--------------|
|                        | Dataset                  | # Imgs | Arch. type           | Backbone             | # Layers              | # Params <sup>a</sup> | Hidden dim            | # Regions       | Position Emb |
| LXMERT                 | COCO+VG                  | 180K   | Encoder              | - <sup>b</sup>       | 9+5+5 <sup>c</sup>    | 2P                    | 768                   | 36              | absolute     |
| ViLBERT                | CC                       | 3M     | Encoder              | BERT <sub>Base</sub> | 12 <sup>c</sup>       | 2.5P                  | 768/1024 <sup>c</sup> | 10~36           | absolute     |
| UNITER <sub>Base</sub> | CC+SBU+COCO+VG           | 4M     | Encoder              | BERT <sub>Base</sub> | 12                    | P                     | 768                   | 10~100          | absolute     |
| Unified VLP            | CC                       | 3M     | Encoder <sup>d</sup> | UniLM <sup>f</sup>   | 12                    | P                     | 768                   | 100             | absolute     |
| Oscar <sub>Base</sub>  | CC+SBU+COCO+VG+Flickr30K | 4M     | Encoder <sup>d</sup> | BERT <sub>Base</sub> | 12                    | P                     | 768                   | 50 <sup>g</sup> | absolute     |
| XGPT                   | CC+COCO                  | 3M     | Enc-Dec <sup>e</sup> | - <sup>b</sup>       | 1 <sup>c</sup> +12+12 | P                     | 768                   | 100             | absolute     |
| VL-T5                  | COCO+VG                  | 180K   | Enc-Dec              | T5 <sub>Base</sub>   | 12+12                 | 2P                    | 768                   | 36              | relative     |
| VL-BART                | COCO+VG                  | 180K   | Enc-Dec              | BART <sub>Base</sub> | 6+6                   | P                     | 768                   | 36              | absolute     |

Table 2. Pretraining tasks used in our vision-and-language pretraining. The images that have any intersection with evaluation set of downstream tasks (e.g., COCO caption, RefCOCOg) and the held-out validation set for pretraining are excluded.

| Task                         | Image source | Text source              | # Examples         |
|------------------------------|--------------|--------------------------|--------------------|
| Multimodal language modeling | COCO, VG     | COCO caption, VG caption | 4.9M (# captions)  |
| Visual question answering    | COCO, VG     | VQA, GQA, Visual7W       | 2.5M (# questions) |
| Image-text matching          | COCO         | COCO caption             | 533K (# captions)  |
| Visual grounding             | COCO, VG     | object&attribute tags    | 163K (# images)    |
| Grounded captioning          | COCO, VG     | object&attribute tags    | 163K (# images)    |

Table 3. Statistics of the datasets used in downstream tasks. The data that are not used for training/validation (e.g., COCO test2015 images) and data for leaderboard submissions (e.g., test-dev/test-std for VQA, test for GQA) are excluded.

| Datasets          | Image source | # Images (train) | # Text (train) | Metric                  |
|-------------------|--------------|------------------|----------------|-------------------------|
| VQA               | COCO         | 123K (113K)      | 658K (605K)    | VQA-score               |
| GQA               | VG           | 82.7K (82.3K)    | 1.08M (1.07M)  | Accuracy                |
| NLVR <sup>2</sup> | Web Crawled  | 238K (206K)      | 100K (86K)     | Accuracy                |
| RefCOCOg          | COCO         | 26K (21K)        | 95K (80K)      | Accuracy                |
| VCR               | Movie Clips  | 110K (80K)       | 290K (212K)    | Accuracy                |
| COCO Caption      | COCO         | 123K (113K)      | 616K (566K)    | BLEU,CIDEr,METEOR,SPICE |
| Multi30K En-De    | Flickr30K    | 31K (29K)        | 31K (29K)      | BLEU                    |

Table 4. Hyperparameters for pretraining and downstream tasks

| Model   | Task              | Learning rate | Batch size | Epochs |
|---------|-------------------|---------------|------------|--------|
| VL-T5   | Pretraining       | 1e-4          | 320        | 30     |
|         | VCR Pretraining   | 5e-5          | 80         | 20     |
|         | VQA               | 5e-5          | 320        | 20     |
|         | GQA               | 1e-5          | 240        | 20     |
|         | NLVR <sup>2</sup> | 5e-5          | 120        | 20     |
|         | RefCOCOg          | 5e-5          | 360        | 20     |
|         | VCR               | 5e-5          | 16         | 20     |
|         | COCO Caption      | 3e-5          | 320        | 20     |
|         | Multi30K En-De    | 5e-5          | 120        | 20     |
| VL-BART | Pretraining       | 1e-4          | 600        | 30     |
|         | VCR Pretraining   | 5e-5          | 120        | 20     |
|         | VQA               | 5e-5          | 600        | 20     |
|         | GQA               | 1e-5          | 800        | 20     |
|         | NLVR <sup>2</sup> | 5e-5          | 400        | 20     |
|         | RefCOCOg          | 5e-5          | 1200       | 20     |
|         | VCR               | 5e-5          | 48         | 20     |
|         | COCO Caption      | 3e-5          | 520        | 20     |
|         | Multi30K En-De    | 5e-5          | 320        | 20     |

## References

- Chen, Y.-c., Li, L., Yu, L., Kholy, A. E., Ahmed, F., Gan, Z., Cheng, Y., and Liu, J. UNITER: UNiversal Image-Text Representation Learning. In *ECCV*, 2020. URL <https://arxiv.org/abs/1909.11740>.
- Devlin, J., Chang, M.-W., Lee, K., and Toutanova, K. BERT: Pre-training of Deep Bidirectional Transformers for Language Understanding. In *NAACL*, oct 2019. URL <http://arxiv.org/abs/1810.04805>.
- Huang, L., Wang, W., Chen, J., and Wei, X. Y. Attention on attention for image captioning. In *ICCV*, pp. 4633–4642, 2019. ISBN 9781728148038. doi: 10.1109/ICCV.2019.00473.
- Karpathy, A. and Fei-Fei, L. Deep Visual-Semantic Alignments for Generating Image Descriptions. In *CVPR*, 2015. ISBN 9781467369640. doi: 10.1109/TPAMI.2016.2598339.
- Lin, T. Y., Maire, M., Belongie, S., Hays, J., Perona, P., Ramanan, D., Dollár, P., and Zitnick, C. L. Microsoft COCO: Common Objects in Context. In *ECCV*, 2014. ISBN 978-3-319-10601-4. doi: 10.1007/978-3-319-10602-1\_48.
- Song, K., Tan, X., Qin, T., Lu, J., and Liu, T.-Y. MASS: Masked Sequence to Sequence Pre-training for Language Generation. In *ICML*, 2019. URL <http://arxiv.org/abs/1905.02450>.
- Tan, H. and Bansal, M. LXMERT: Learning Cross-Modality Encoder Representations from Transformers. In *EMNLP*, 2019. URL <http://arxiv.org/abs/1908.07490>.
- Yu, L., Lin, Z., Shen, X., Yang, J., Lu, X., Bansal, M., and Berg, T. L. MAttNet : Modular Attention Network for Referring Expression Comprehension. In *CVPR*, 2018. URL <https://arxiv.org/abs/1801.08186>.
